# Supplementary material for: Gyroidal MOFs: anion-coordination effect enables inverse architecture and enhanced moisture stability
Source: Royal Society of Chemistry journal article supplement (doi:10.1039/d2qi02361j), 2023-01-01
Supplement: d2qi02361j1.pdf [file d2qi02361j1.pdf]

## Supporting information

### **Gyroidal MOFs: Anion Coordination Effect Enables Inverse Architecture and Enhanced Moisture Stability**

Guo-Jian Ren,<sup>a</sup> Na Li,<sup>\*a,b</sup> Nan Lu,<sup>a</sup> Qiang Gao,<sup>a</sup> Ying-Hui Zhang,<sup>a</sup> Xuemin Wang,<sup>a</sup> Ze Chang,<sup>a</sup> Yan-Qing Liu,<sup>a</sup> and Xian-He Bu<sup>a,b</sup>

\*Corresponding author. E-mail: [lina@nankai.edu.cn](mailto:lina@nankai.edu.cn)

#### **CONTENTS**

**S1. The valence state calculation**

**S2. Adsorption measurements**

**S3. DFT theoretical calculations**

**S4. Vacuum treatment of fresh crystal of GMOF-2**

**S5. Structural figures, supplementary characterizations**

## S1. The valence state calculation

The valence of a bond between two atoms, *i* and *j* is given by  $S_{ij}$ . The sum of  $S_{ij}$  is the valence of the *i* atom. The calculated results are shown in the table 1.<sup>[S1]</sup>

$$V_i = \sum_j S_{ij} = \sum_j \exp\left(\frac{r_0 - r_{ij}}{B}\right)$$

**Table S1.** Bond valence sum (BVS) of there GMOFs

|     | GMOF-1                       |                               | GMOF-2                       |                               | GMOF-3                       |                               |
|-----|------------------------------|-------------------------------|------------------------------|-------------------------------|------------------------------|-------------------------------|
|     | V <sub>Co<sup>II</sup></sub> | V <sub>Co<sup>III</sup></sub> | V <sub>Co<sup>II</sup></sub> | V <sub>Co<sup>III</sup></sub> | V <sub>Co<sup>II</sup></sub> | V <sub>Co<sup>III</sup></sub> |
| Co1 | 1.730                        | 1.982                         | 1.818                        | 2.081                         | 1.866                        | 2.145                         |
| Co2 | 1.637                        | 2.006                         | 1.628                        | 1.997                         | 1.701                        | 2.084                         |
| Co3 | 1.516                        | 1.708                         | 1.516                        | 1.796                         | 1.798                        | 1.958                         |

## S2. Adsorption measurements

The samples were treated with supercritical CO<sub>2</sub> in a Tousimis™ Samdri® PVT-30 critical point dryer. Prior to drying, the DMA solvated samples were soaked in absolute ethanol to exchange the occluded solvent for C<sub>2</sub>H<sub>5</sub>OH for 48 h. Then the ethanol-containing samples were placed inside the dryer and the ethanol was exchanged with CO<sub>2</sub> (liquid) over a period of 6 hours according to literature.<sup>[S2]</sup>

The processed samples were loaded in sample tubes and activated under high vacuum (less than 10<sup>-5</sup> Torr) at 60 °C for GMOF-2 and GMOF-3. Degassed samples were used for gas sorption measurements. Gas adsorption measurements were performed using an ASAP 2020 M gas adsorption analyzer.

The N<sub>2</sub> sorption isotherms were collected at 77 K in a liquid nitrogen bath. The CO<sub>2</sub> sorption isotherms were collected at 273 K in an ice water mixture bath, and a water bath was used for adsorption isotherms at 298 K as the center-controlled air conditioner was set up at 25 °C. The measurements of H<sub>2</sub>O were preceded at 273 K in an ice water mixture bath, and a water bath was used for adsorption isotherms at 298 K as the center-controlled air conditioner was set up at 25 °C.

## S3. DFT theoretical calculations

The theoretical calculations of the adsorption of H<sub>2</sub>O molecule by coordination polymer were carried out by DFT theoretical calculation with wB97XD<sup>[S3]</sup> functional

in Gaussian 09<sup>[S4]</sup> program package. The 6-31G(d) basis set for all nonmetal atoms and Lanl2DZ basis set and pseudo potential for Co(II) ion were adopted in calculation. Based on crystal data, two structure units, the trinuclear and dinuclear cluster, were constructed for theoretical calculation, where the organic ligand was replaced by pyridine and methyl-tetrazole for saving computation time.

**Table S2.** Average bond order

| Building block     |                                           | Mayer bond order | Wiberg bond order | Natural bond order |
|--------------------|-------------------------------------------|------------------|-------------------|--------------------|
| Trinuclear cluster | Br-coordinated                            | 2.185            | 1.631             | 2.138              |
|                    | Non-coordinated                           | 2.055            | 1.549             | 2.087              |
| Dinuclear cluster  | NO <sub>3</sub> <sup>-</sup> -coordinated | 2.082            | 1.705             | 2.440              |
|                    | Non-coordinated                           | 2.066            | 1.646             | 2.340              |

Predicted in Wb97xd/6-31G(d)-Lanl2DZ theoretical level

#### **S4. Vacuum treatment of fresh crystal of GMOF-2**

To confirm the sensibility of GMOF-2 toward H<sub>2</sub>O molecules, the fresh blue crystals were put into the vacuum drier and some water was placed at the bottom of the drier. When the vacuum degree reached the 0.99, the crystals were gradually turned into red. As the water was poured out, the crystals became blue again before vacuum degree reached the 0.99.

#### References

- S1. J. H. Jia, X. Lin, C. Wilson, A. J. Blake, N. R. Champness, P. Hubberstey, G. Walker, E. J. Cussen, M. Schröder, Twelve-connected porous metal–organic frameworks with high H<sub>2</sub> adsorption, *Chem. Commun.* 2007, **8**, 840-842.
- S2. A. P. Nelson, O. K. Farha, K. L. Mulfort, J. T. Hupp, Supercritical processing as a route to high internal surface areas and permanent microporosity in metal-organic framework materials, *J. Am. Chem. Soc.* 2009, **131**, 458-460.
- S3. J. D. Chai, M. Head-Gordon, Long-range corrected hybrid density functionals with damped atom–atom dispersion corrections, *Phys. Chem. Chem. Phys.* 2008, **10**, 6615-6620.
- S4. *Gaussian 09, Revision B.01*: Frisch, M. J. *et al.* Gaussian, Inc.: Wallingford, CT, **20**.

## S5. Structural figures, supplementary characterizations

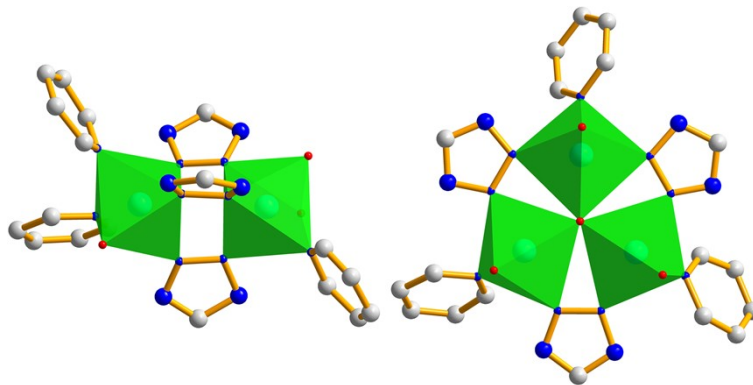

**Fig. S1** Coordination configurations of SBU(I) and SBU(II) in GMOF-1 (gray C, blue N, red O, green Co, while H atoms were omitted for simplification).

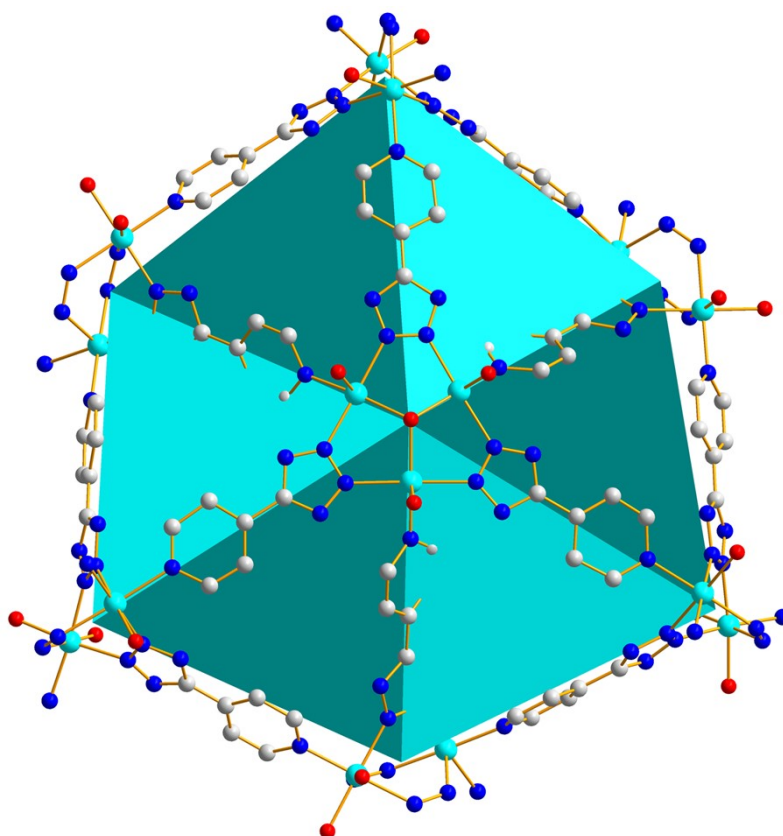

**Fig. S2** Non-planar hexagon built by the connection of one SBU (I), six SBU(II), and 4-Ptz ligands in GMOF-1.

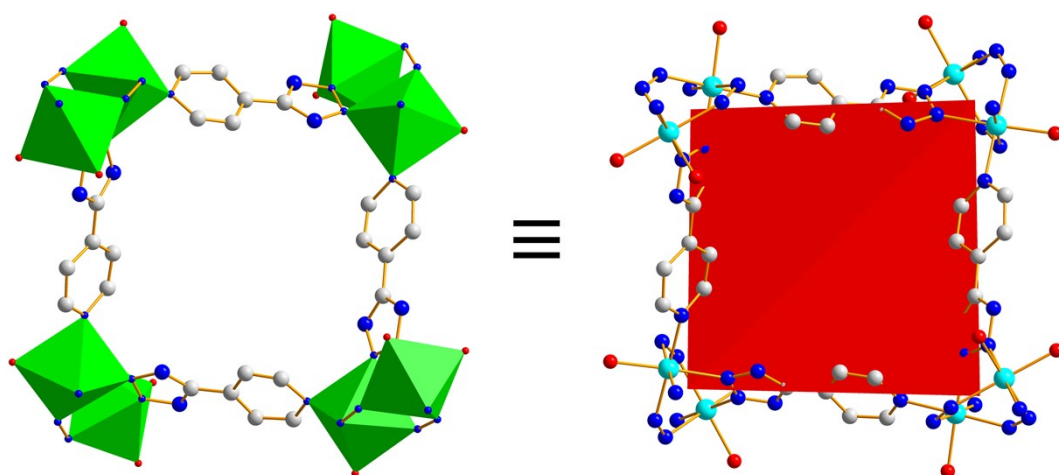

**Fig. S3** Twisted quadrangle constructed by the connection of four SBU (II) and 4-Ptz ligands in GMOF-1.

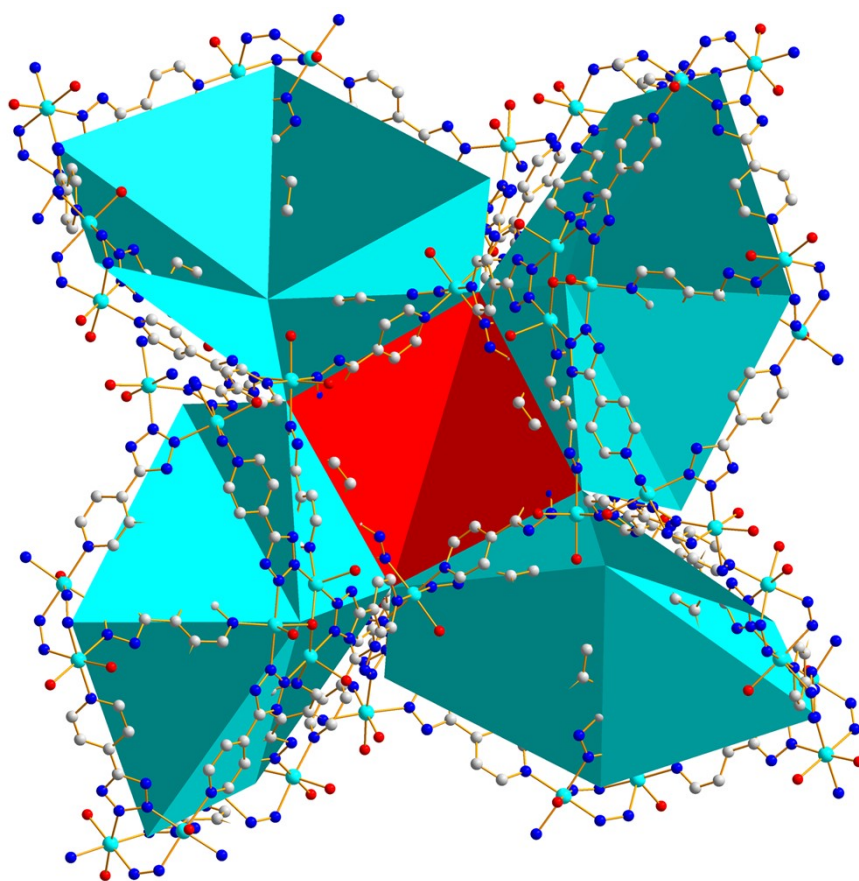

**Fig. S4** Four-vaned windmill constructed by double-vertex shared mode of non-planar hexagons in GMOF-1.

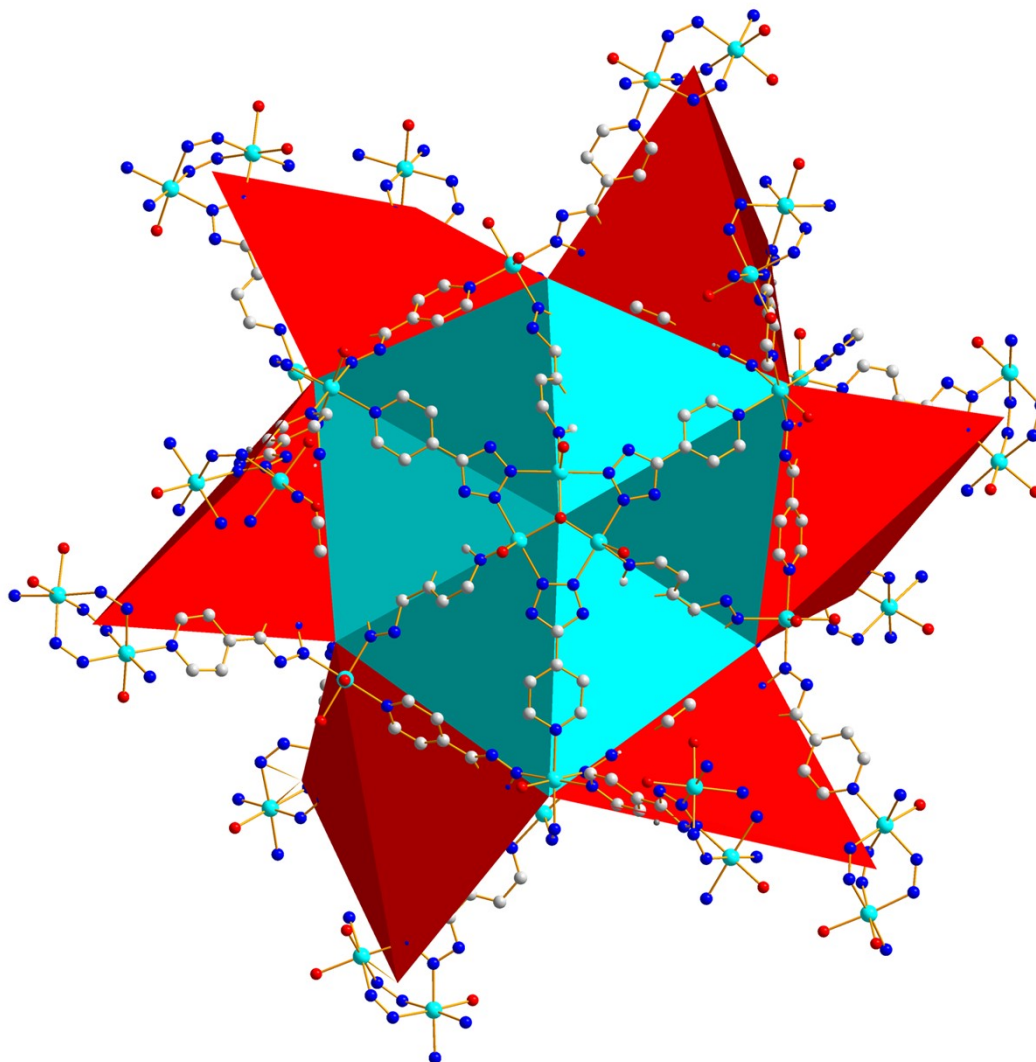

**Fig. S5** Six-vented windmill built by double-vertex shared mode of twisted quadrangle in GMOF-1.

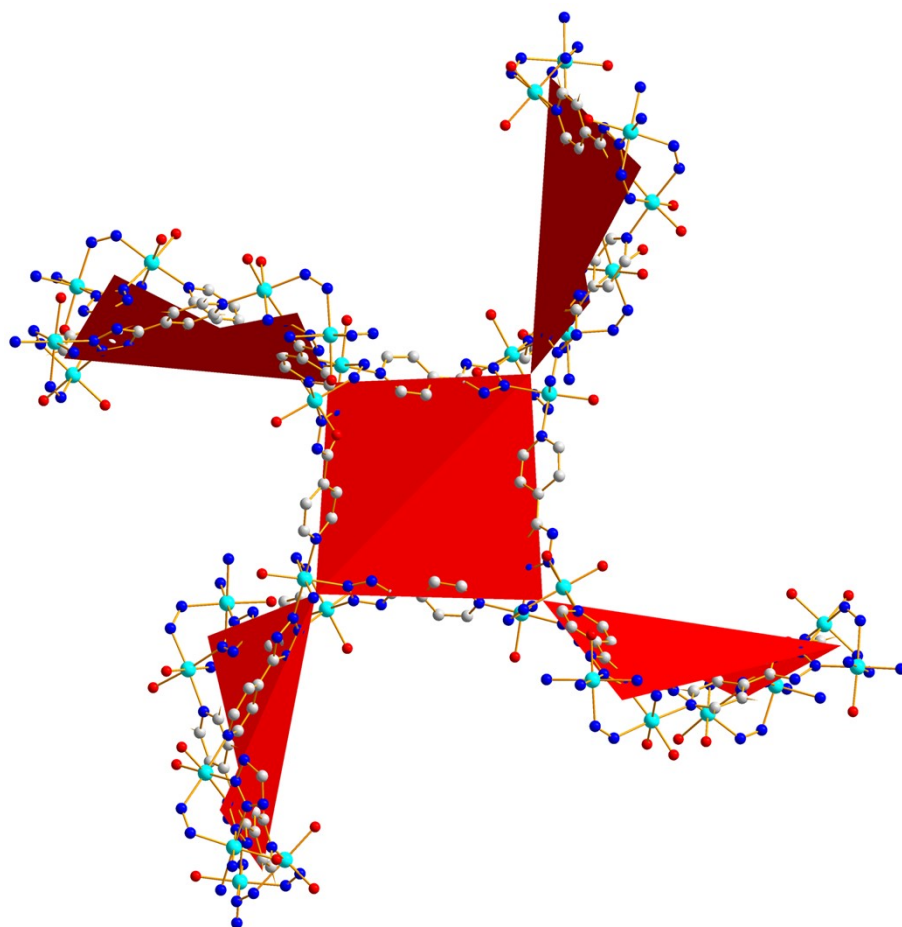

**Fig. S6** Single-vertex linkage mode of twisted quadrangle in GMOF-1.

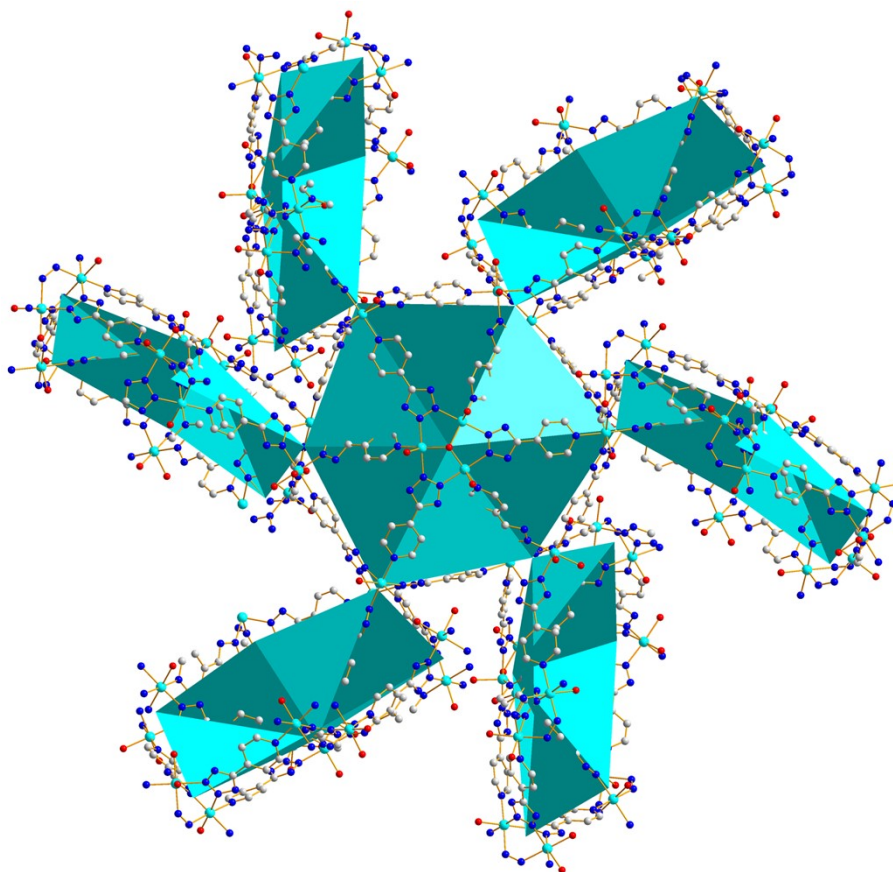

**Fig. S7** Single-vertex linkage mode of non-planar hexagon in GMOF-1.



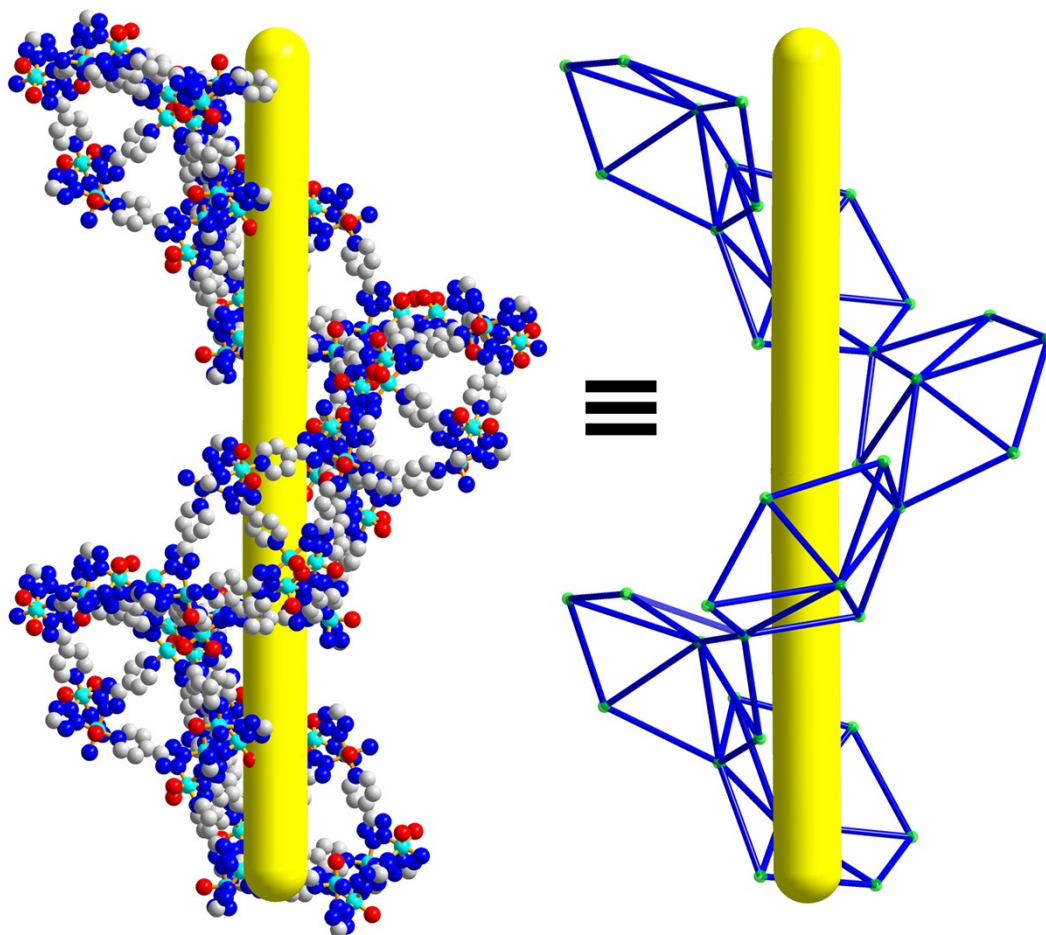

**Fig. S8** Right-handed channel exhibition through vertex-sharing connection of non-planar hexagons in GMOF-1.

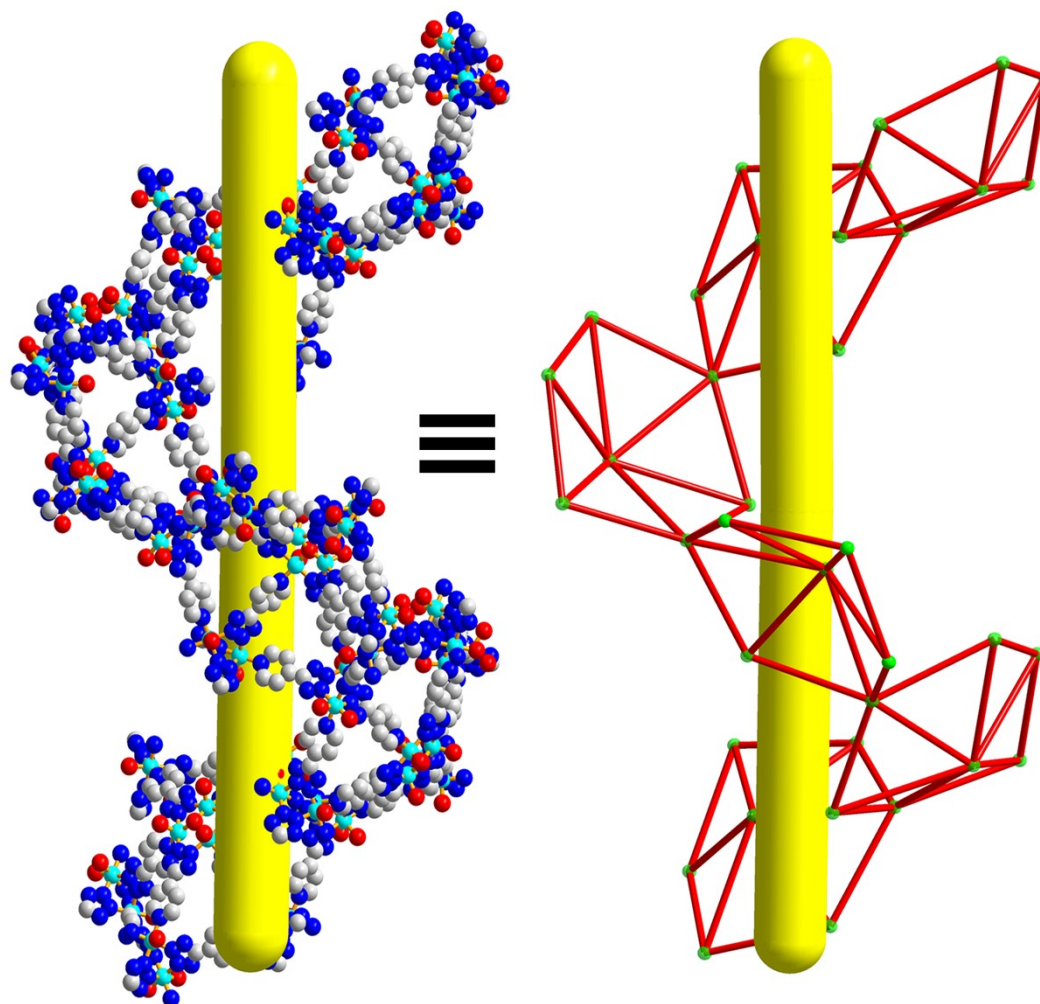

**Fig. S9** Left-handed channel exhibition through vertex-sharing connection of non-planar hexagons in GMOF-1.

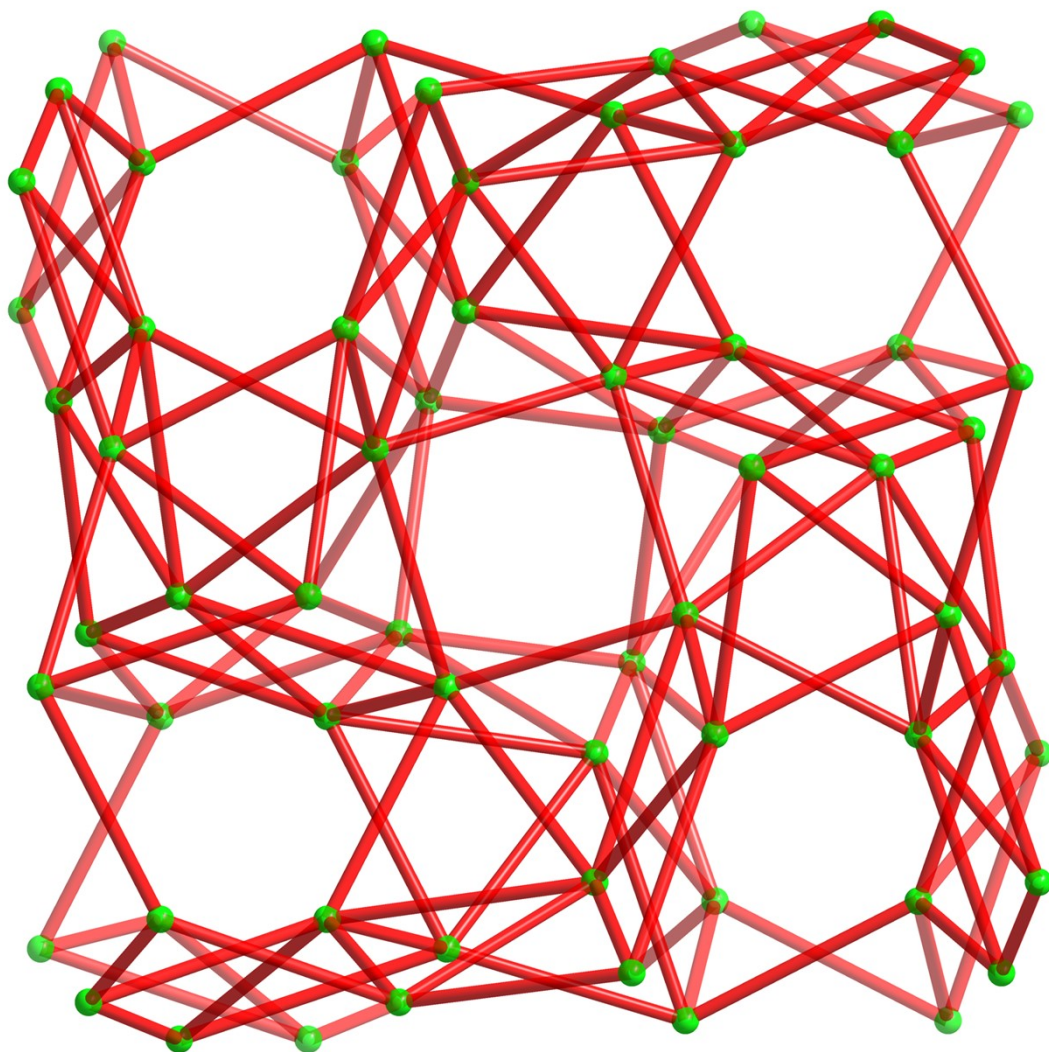

**Fig. S10** The topological presentation of GMOF-1 in *a* axis.

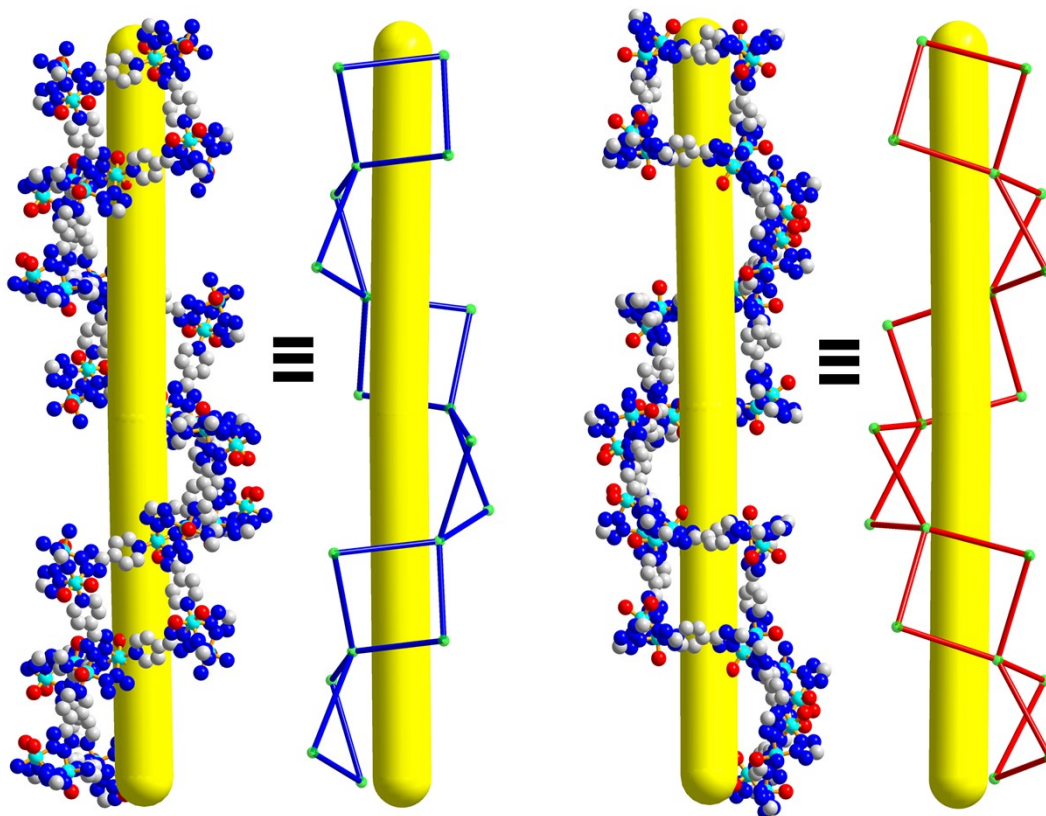

**Fig. S11** Helical channels exhibition through vertex-sharing connection of twisted quadrangles of GMOF-1.

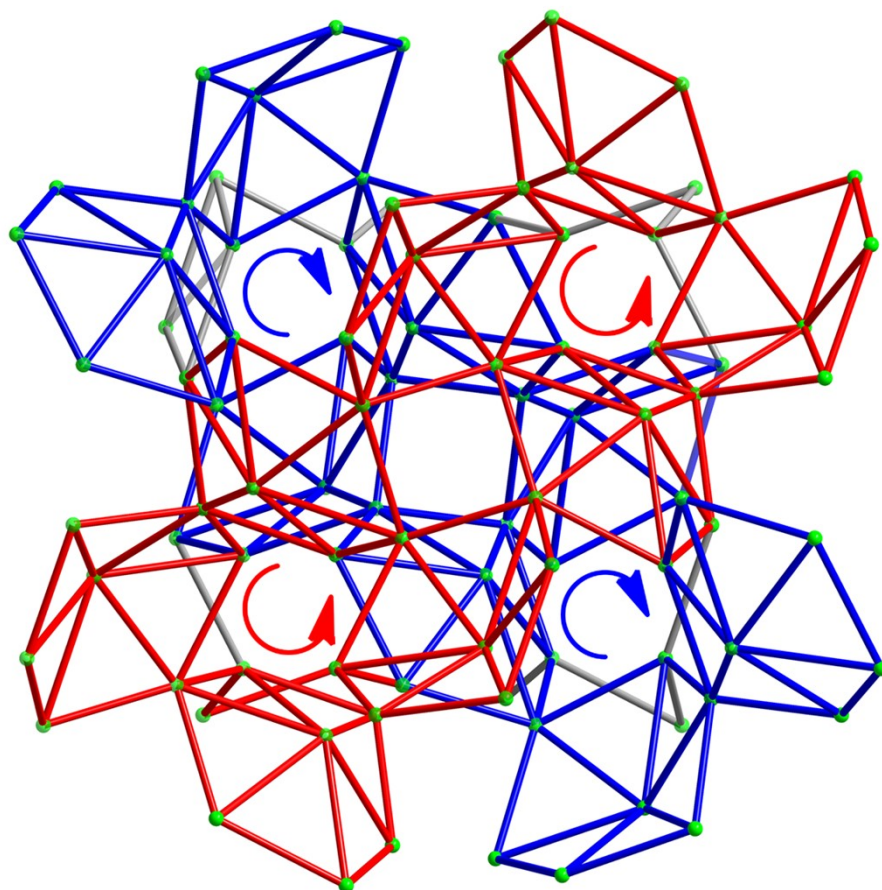

**Fig. S12** The exhibition of the helical channel in GMOF-1 through vertex connection of non-planar hexagons.

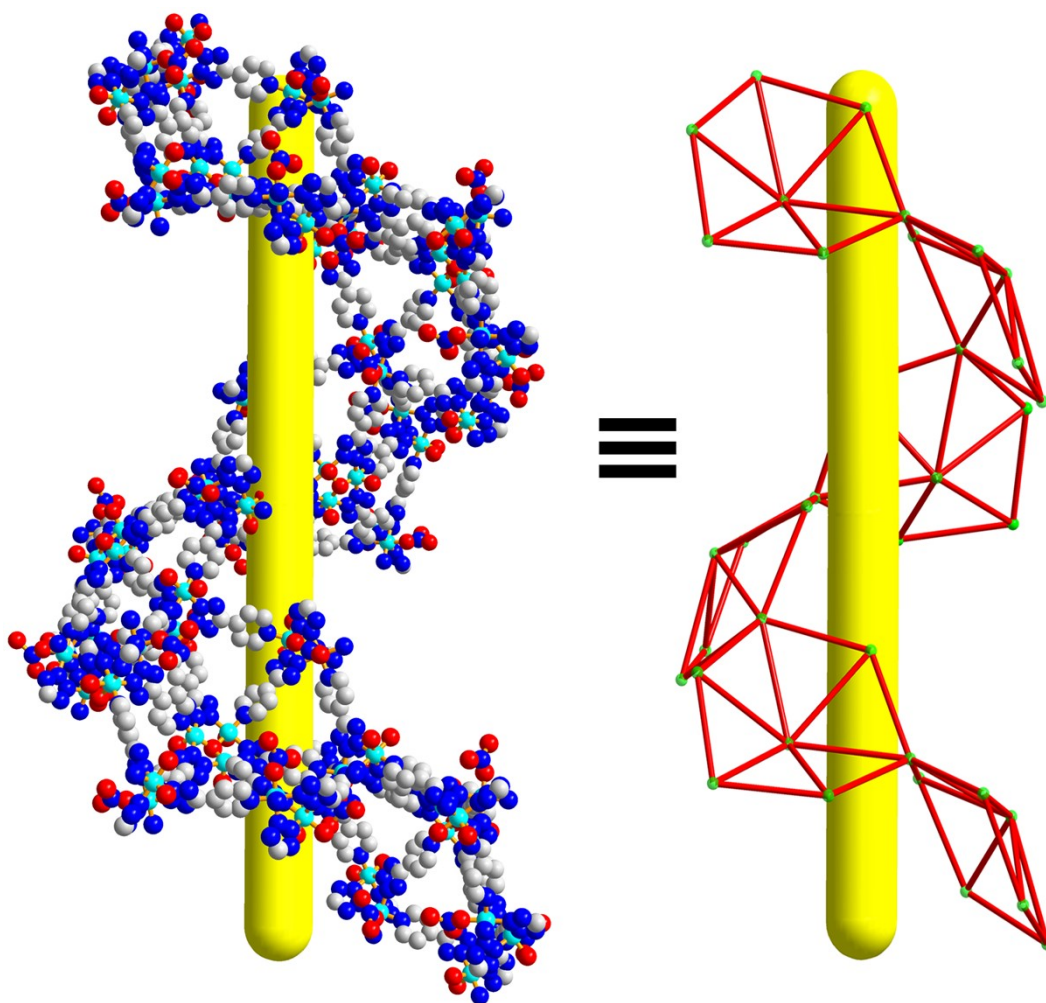

**Fig. S13** Left-handed channel exhibition through vertex-sharing connection of non-planar hexagons in GMOF-3.

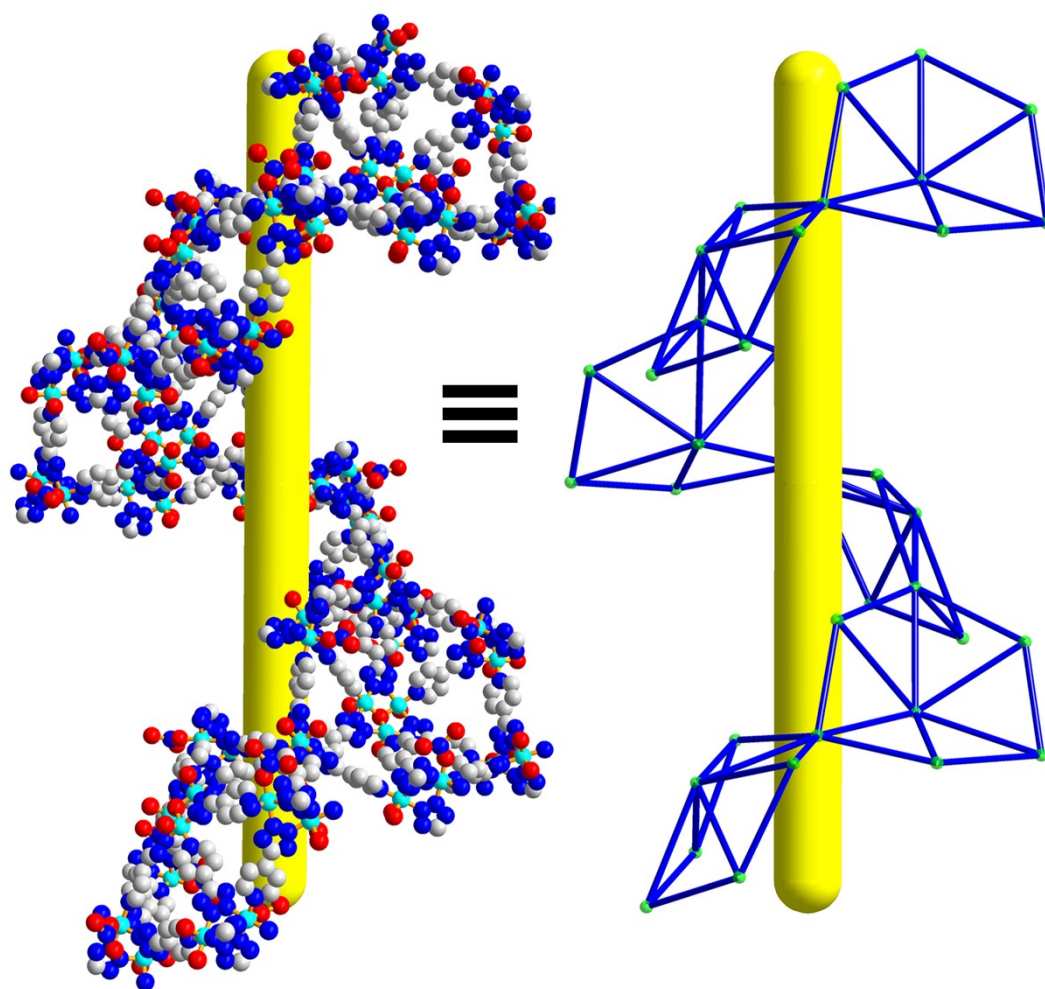

**Fig. S14** Right-handed channel exhibition through vertex-sharing connection of non-planar hexagons in GMOF-3.

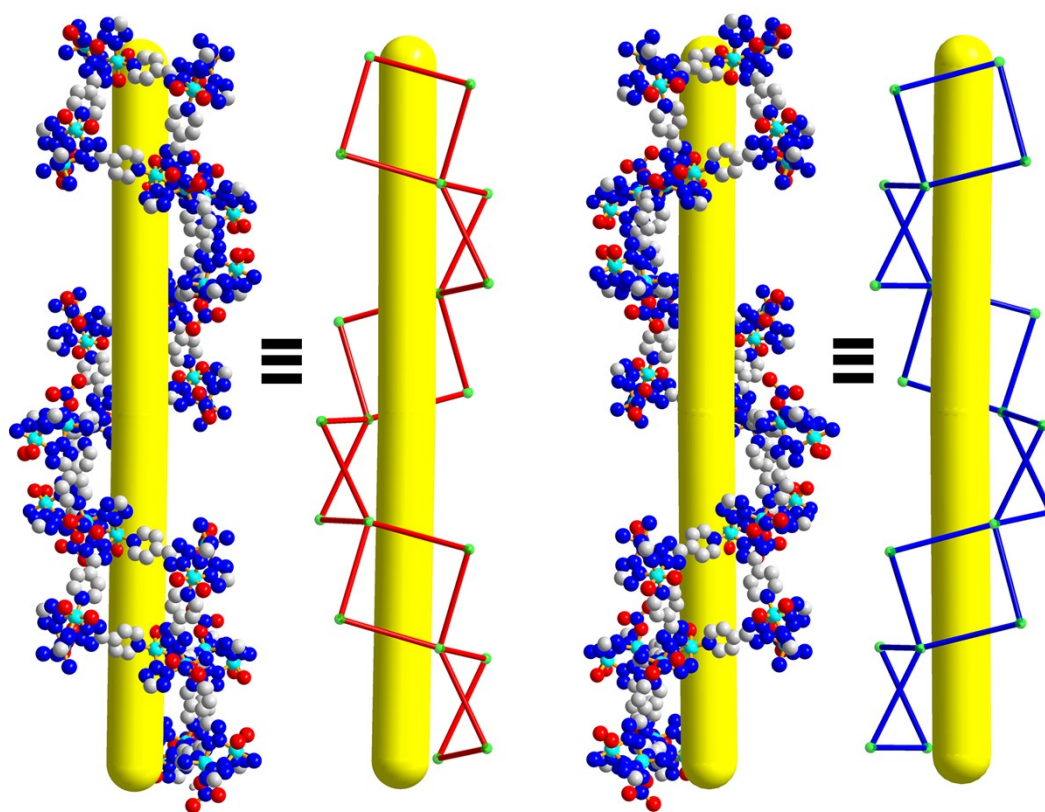

**Fig. S15** Helical channels exhibition through vertex-sharing connection of twisted quadrangles of GMOF-3.



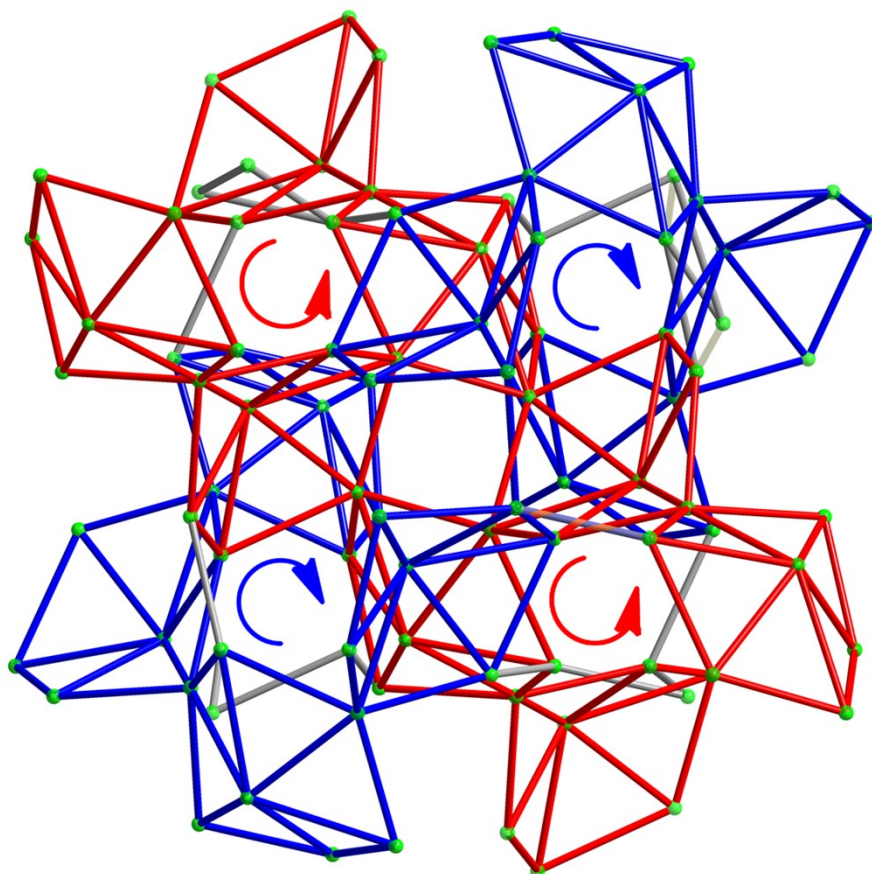

**Fig. S16** The presentation of helical channel in GMOF-3 through vertex connection of non-planar hexagons.

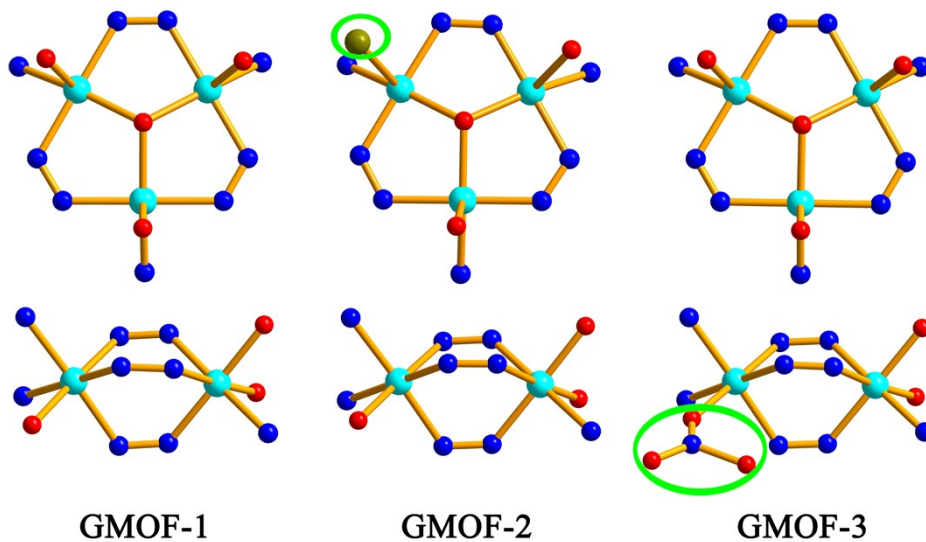

**Fig. S17** Left: coordinated environments of SBUs in GMOF-1; Middle: coordinated environments of SBUs in GMOF-2; Right: coordinated environments of SBUs in GMOF-3 (gray C, blue N, red O, turquoise Co, dark yellow Br).

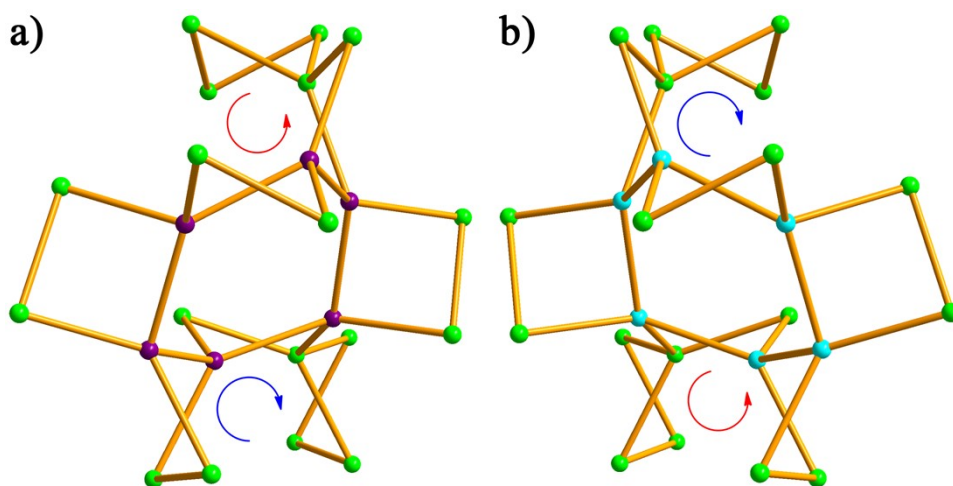

**Fig. S18** Inverse channel presentation in GMOF-1 (a) and (b) GMOF-3 containing asymmetric unit in  $a$  axis (green: SBU(II) in twisted quadrangle; violet: SBU(II) in hexagonal concave of GMOF-1; light blue: SBU(II) in hexagonal concave of GMOF-3).

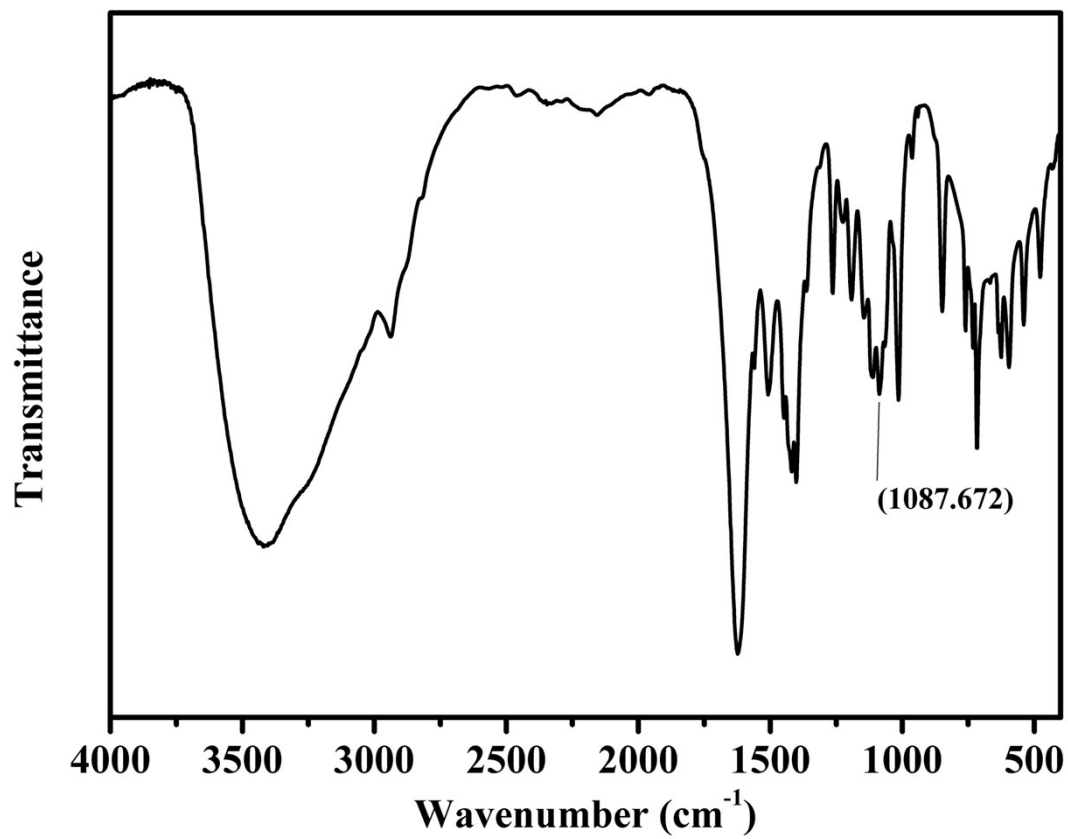

Fig. S19 IR spectrum of GMOF-1.

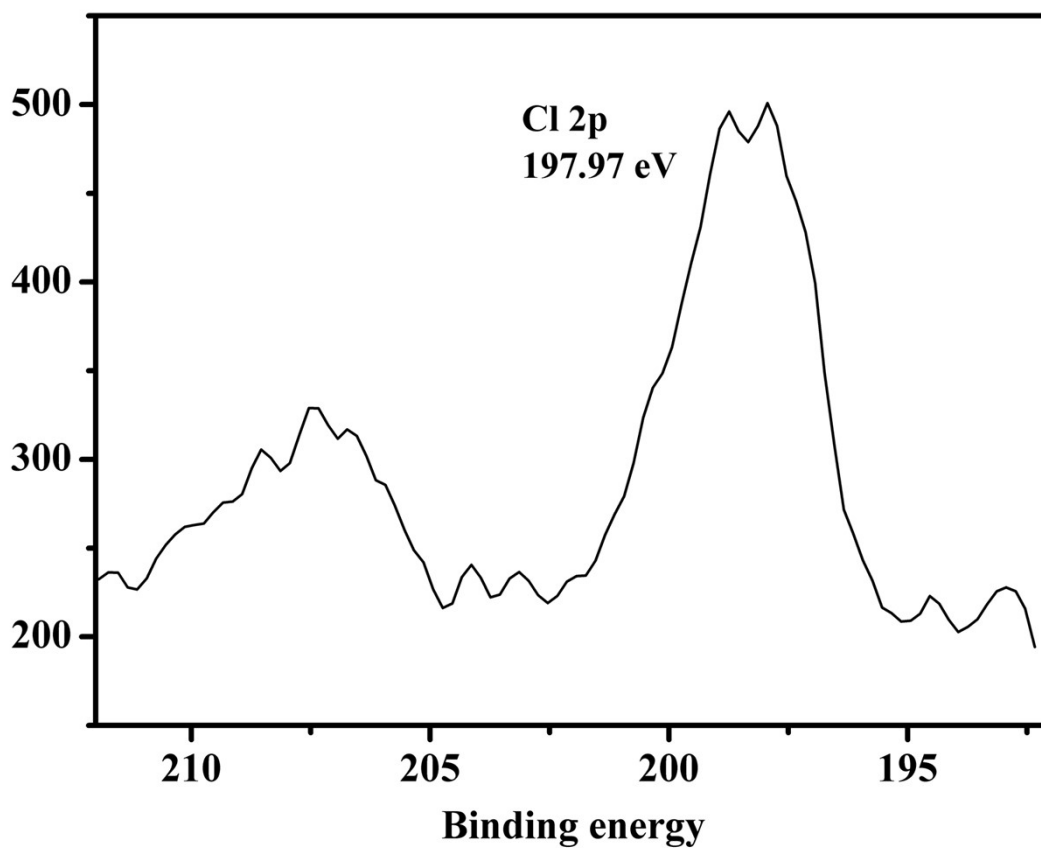

**Fig. S20** XPS spectrum of GMOF-1.

**Table S3** Relative atomic ratio of GMOF-1 through XPS spectrum.

| Element             | C1s    | N1s    | O1s    | Cl2p   | Co2p3  |
|---------------------|--------|--------|--------|--------|--------|
| Atomic Ratio        | 57.82  | 26.27  | 8.97   | 2.1    | 4.84   |
| Binding Energy (eV) | 284.80 | 399.27 | 531.61 | 197.97 | 780.94 |

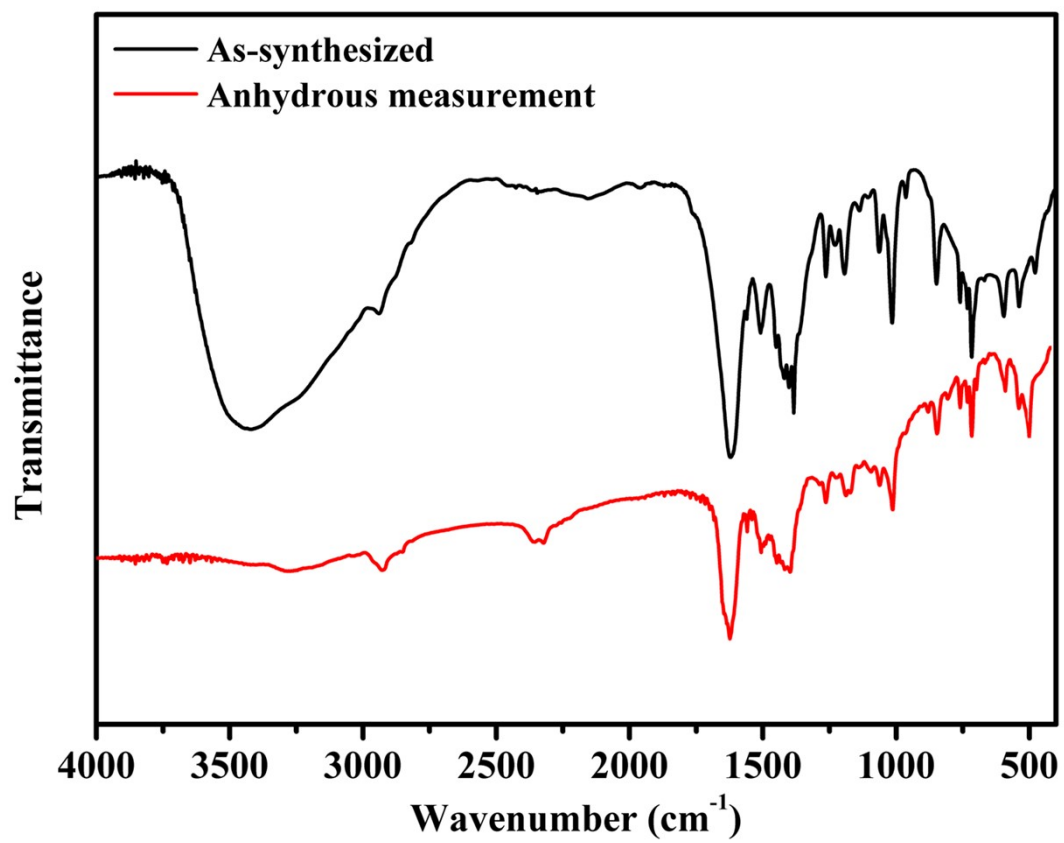

Fig. S21 IR spectra of GMOF-2.

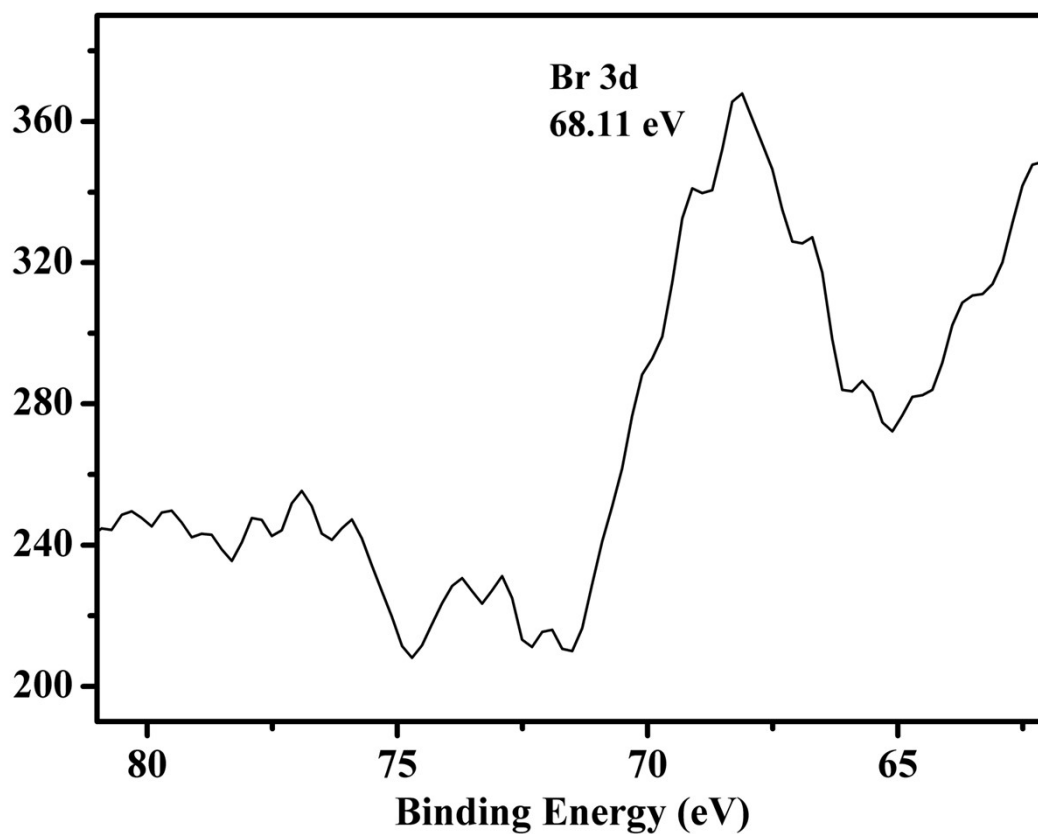

**Fig. S22** XPS spectrum of GMOF-2.

**Table S4.** Relative atomic ratio of GMOF-2 through XPS spectrum.

| Element             | C1s    | N1s    | O1s    | Co2p3  | Br3d  |
|---------------------|--------|--------|--------|--------|-------|
| Atomic Ratio        | 66.12  | 21.27  | 8.35   | 3.75   | 0.44  |
| Binding Energy (eV) | 284.80 | 399.66 | 532.28 | 781.06 | 68.11 |

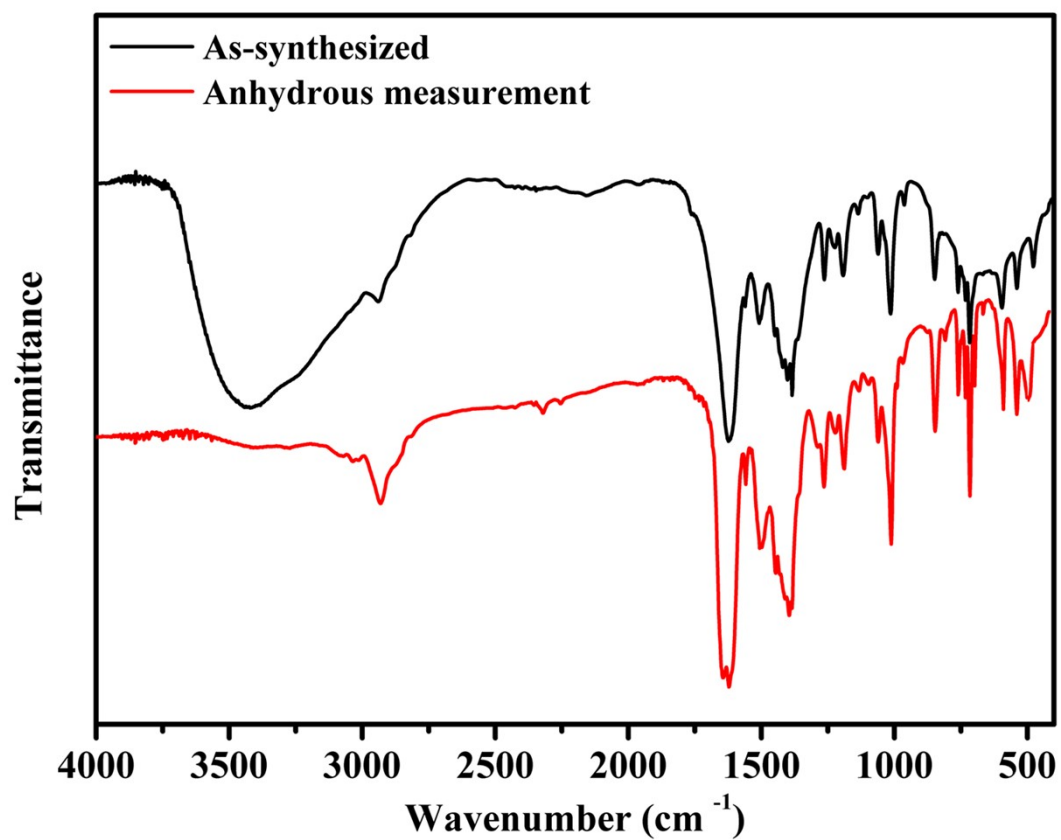

Fig. S23 IR spectra of GMOF-3.



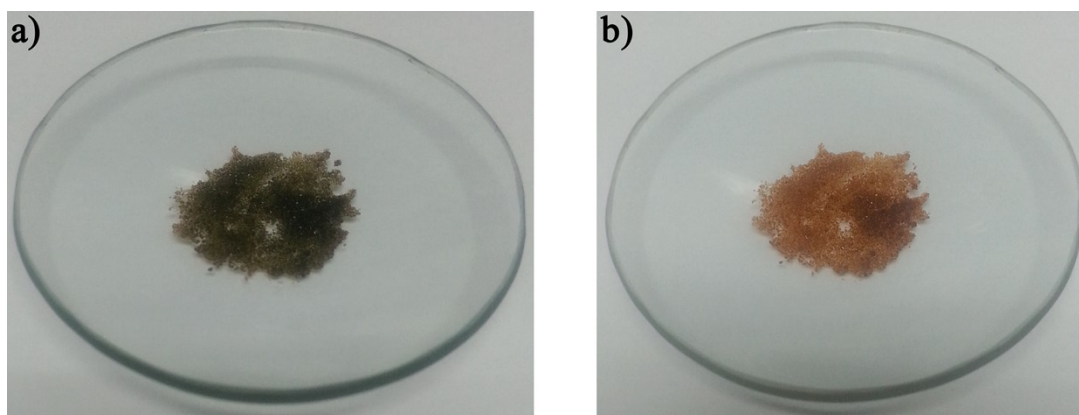

**Fig. S24** (a) Fresh sample of GMOF-2, (b) Color change of GMOF-2 as exposed to moist air for few minutes.

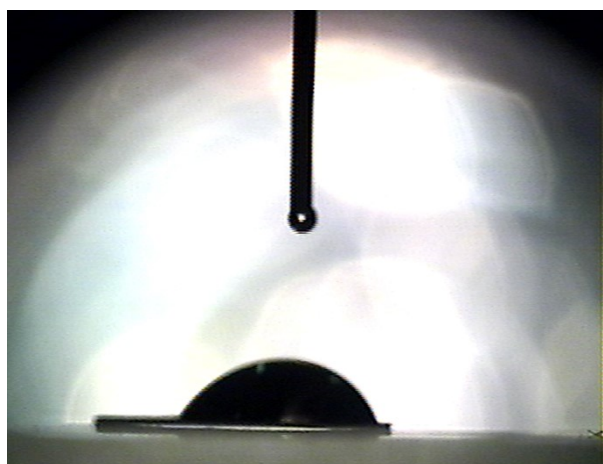

**Fig. S25** Static contact angle of water of GMOF-2.

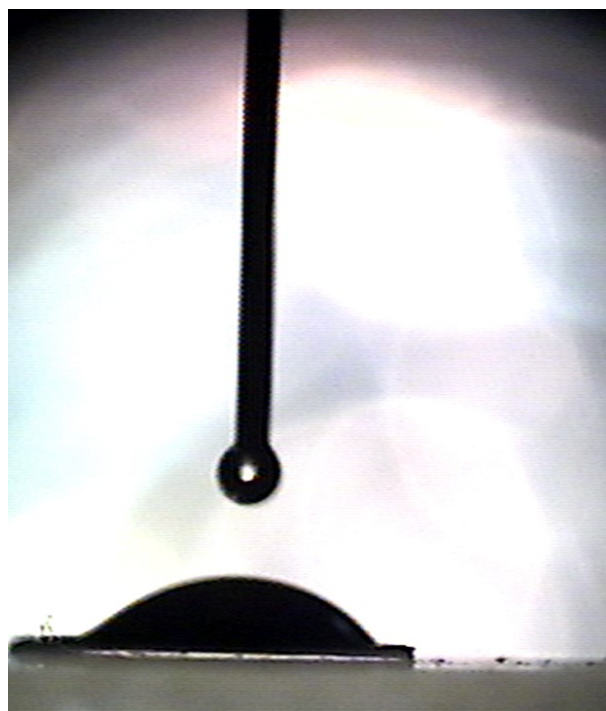

Fig. S26 Static contact angle of water of GMOF-3.

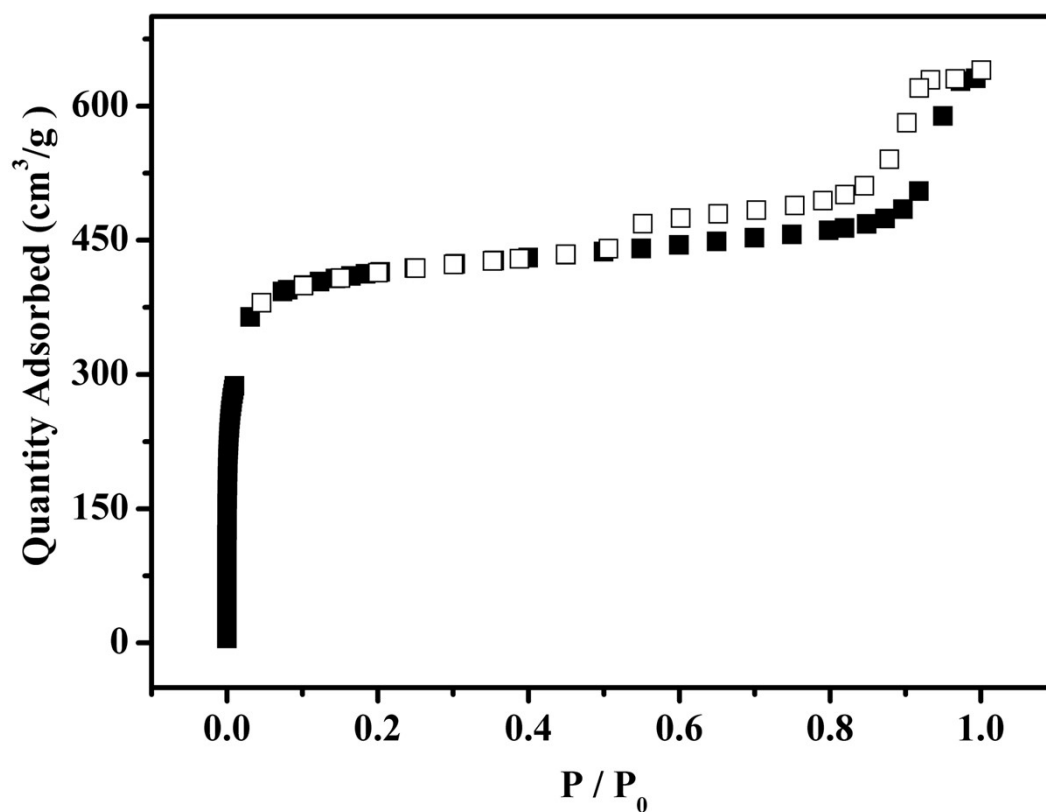

Fig. S27  $\text{N}_2$  adsorption isotherm of GMOF-2 at 77 K.

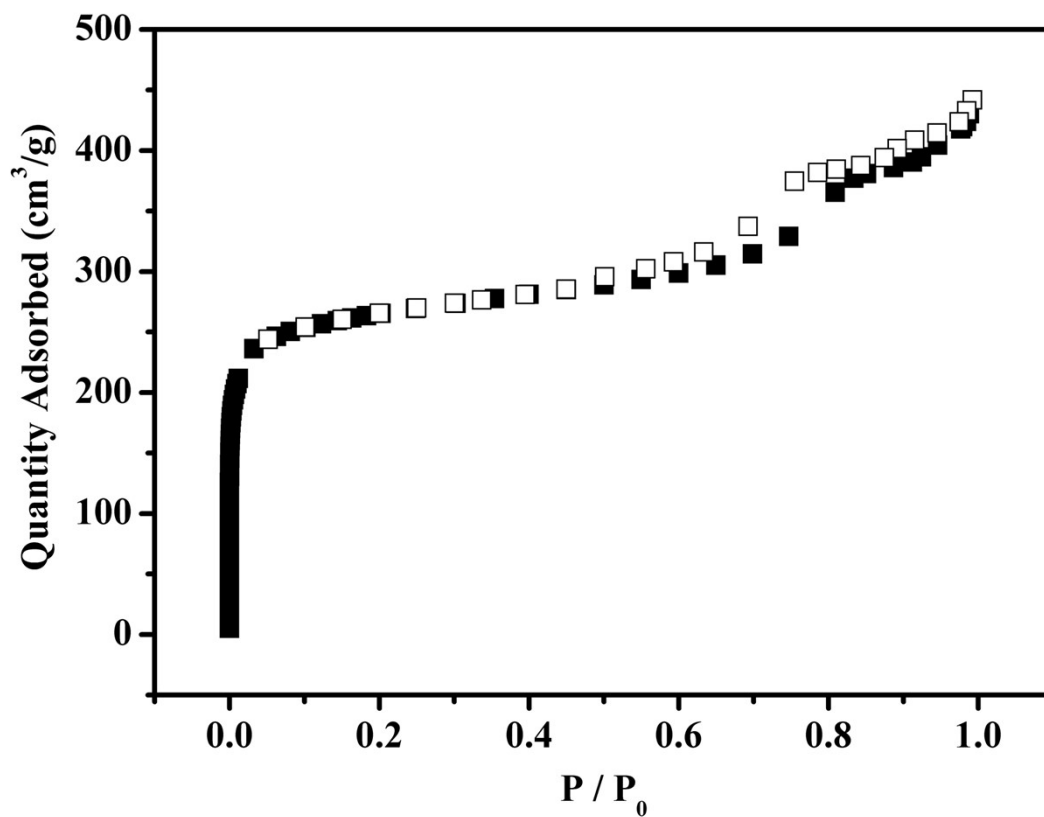

Fig. S28 N<sub>2</sub> adsorption isotherm of GMOF-3 at 77 K.

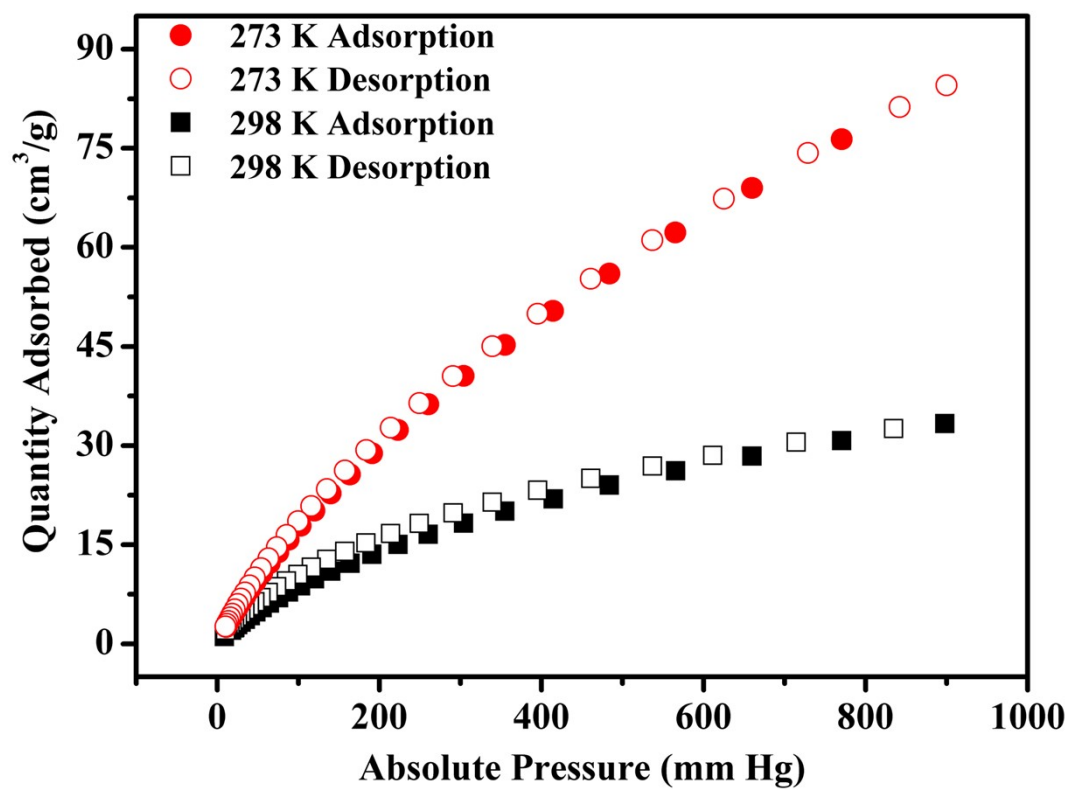

Fig. S29 CO<sub>2</sub> adsorption isotherms of GMOF-2.

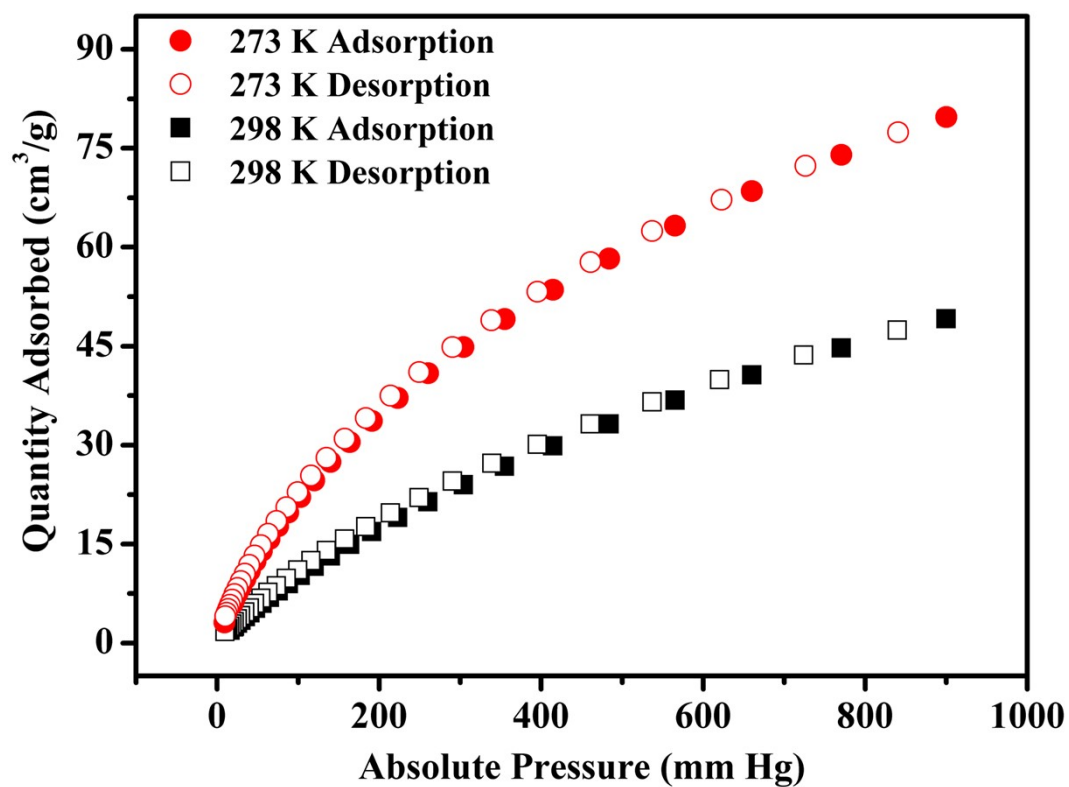

Fig. S30 CO<sub>2</sub> adsorption isotherms of GMOF-3.

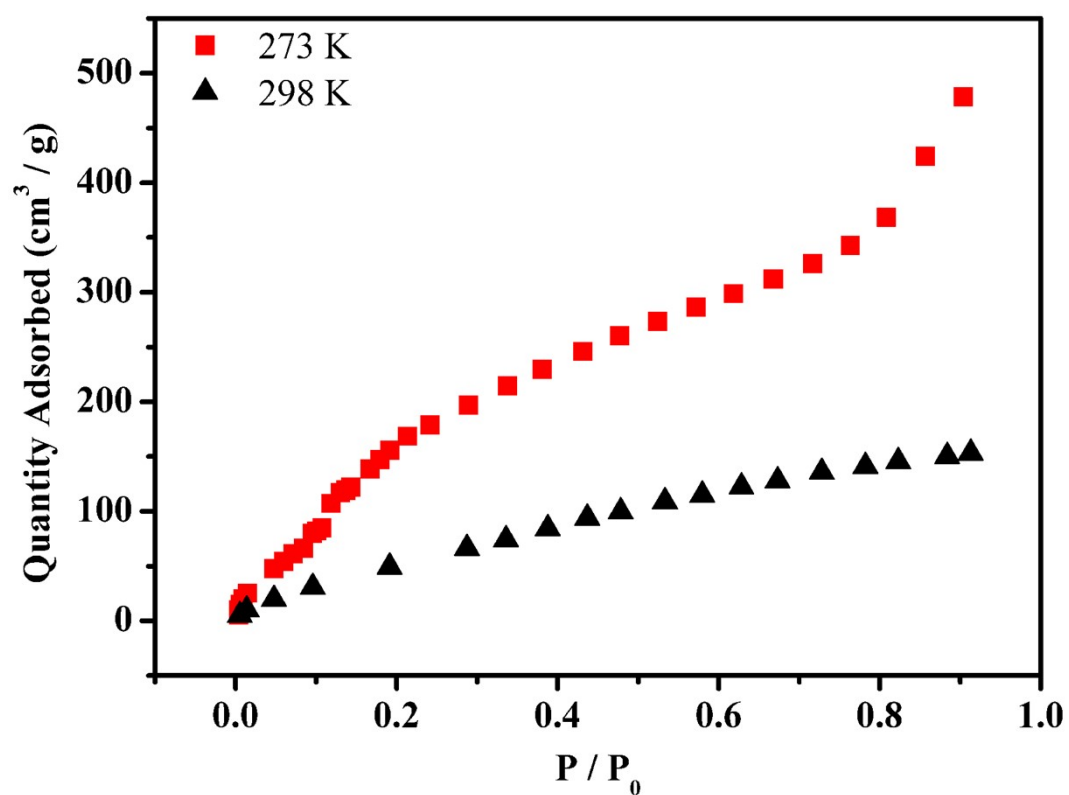

Fig. S31 H<sub>2</sub>O adsorption isotherms of GMOF-2.

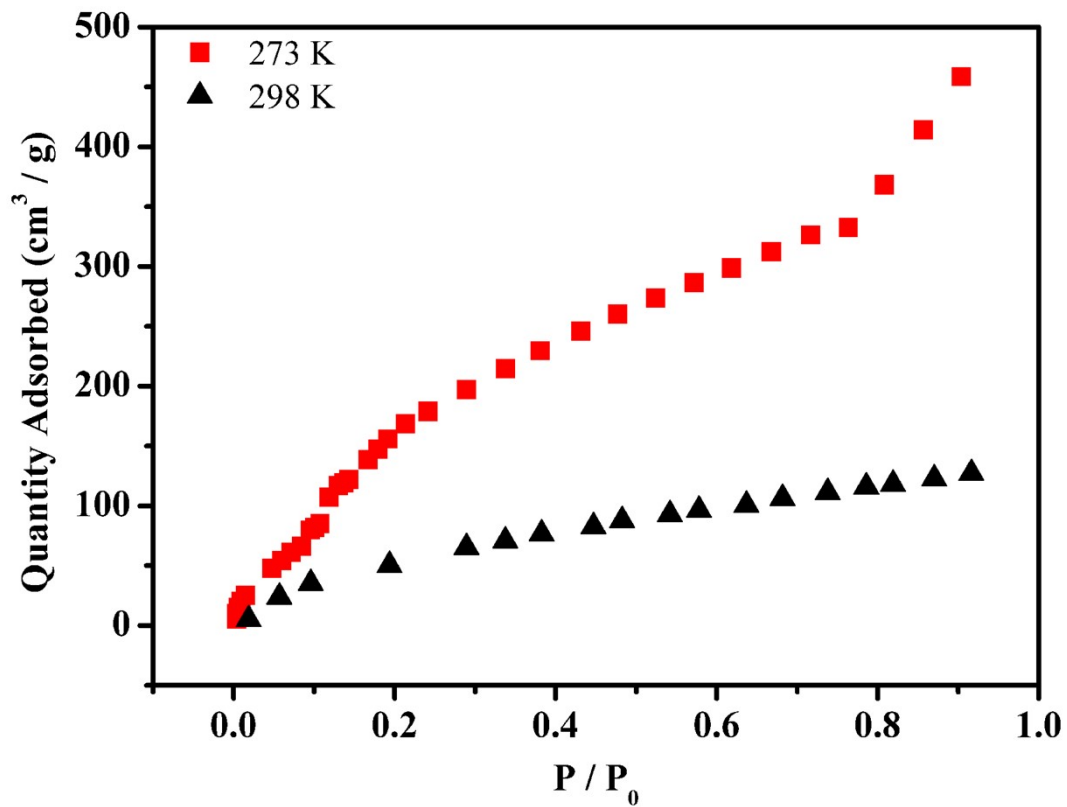

Fig. S32 H<sub>2</sub>O adsorption isotherms of GMOF-3.
